# Supplementary material
Source: Royal Society of Chemistry journal article supplement (doi:10.1039/d6tc00516k)
Supplement: d6tc00516k1.pdf [file d6tc00516k1.pdf]

Supplementary Information (SI) for Journal of Materials Chemistry C. This journal is © The Royal Society of Chemistry 2024

## Supporting Information

### On-demand optical printing of Ag-based neuromorphic devices for brain-inspired learning

Bharath Bannur<sup>a,\*</sup> & Sajan Daniel George<sup>a,b,\*</sup>

<sup>a</sup>Manipal Institute of Applied Physics, Manipal Academy of Higher Education, Manipal, 576104, India.

<sup>b</sup>Center for Applied Nanosciences (CANs), Manipal Academy of Higher Education, Manipal, 576104, India.

\*Email: sajan.george@manipal.edu; bharath.b@manipal.edu

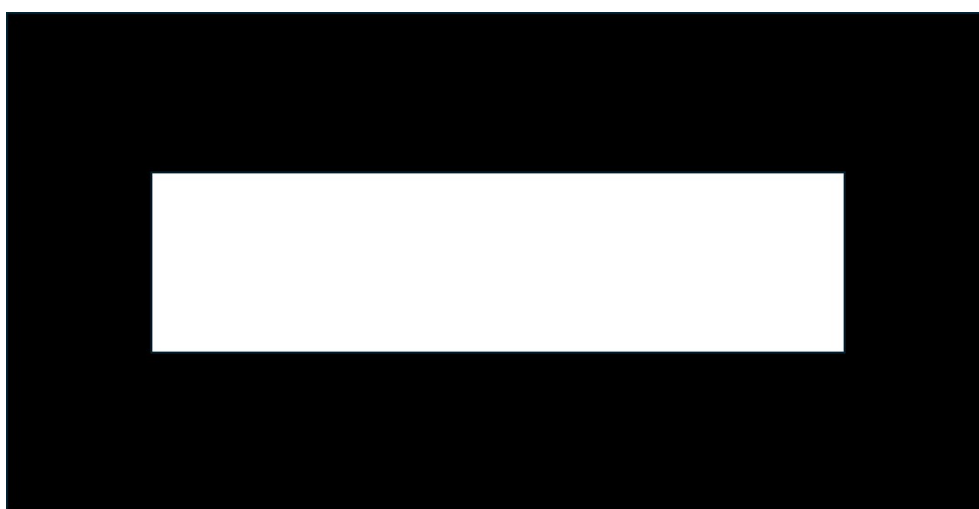

**Figure S1.** White rectangular pattern on a dark background prepared in PowerPoint for printing.

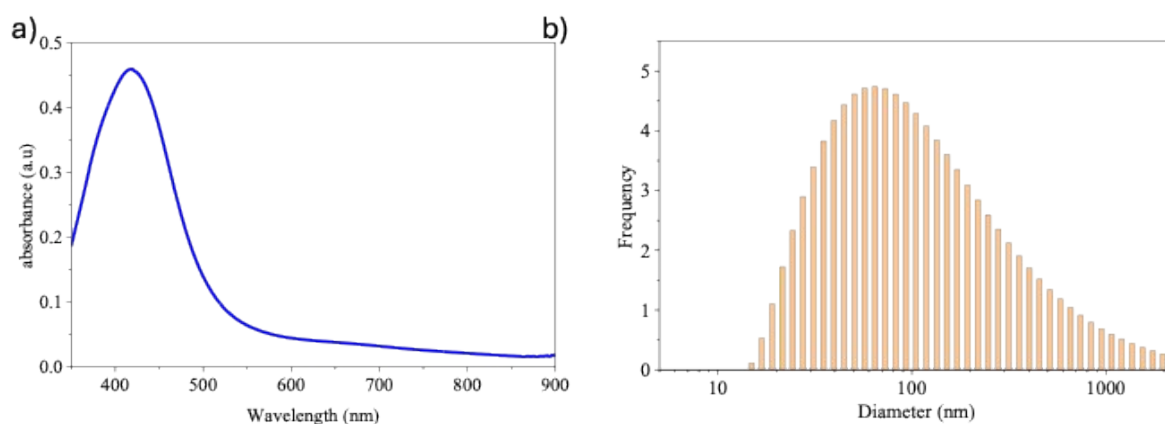

**Figure S2.** a) UV-Vis absorption spectrum of the prepared Ag colloidal solution. b) Particle size distribution of the Ag nanoparticles.

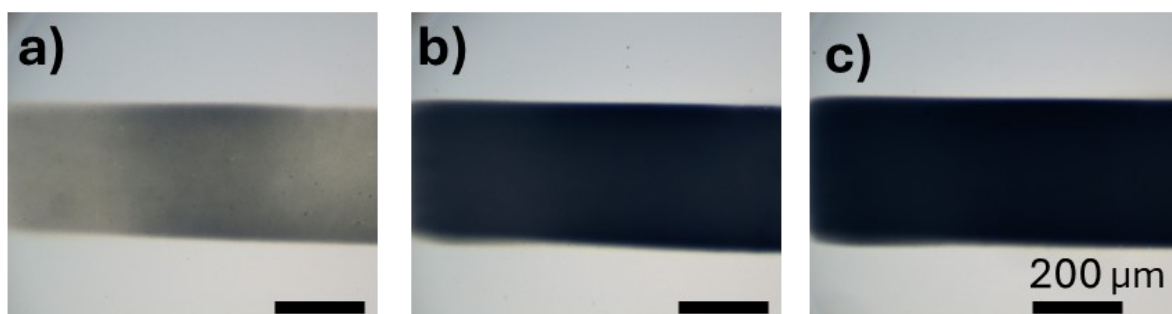

**Figure S3.** Optical images of prints obtained after 3, 6, and 9 minutes, showing reduced transmittance (increased opacity) with longer printing time, indicative of continuous film formation.

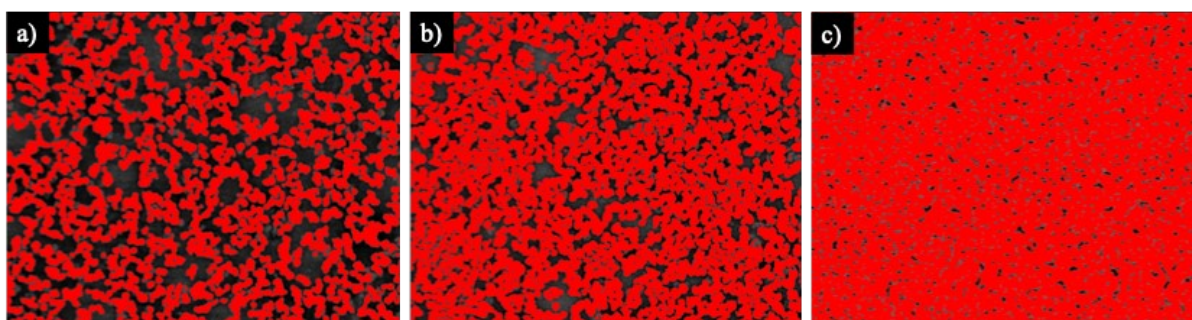

**Figure S4.** Fill factor analysis using FIJI (ImageJ) software for a) 3min b) 6min and 9) min printed film.

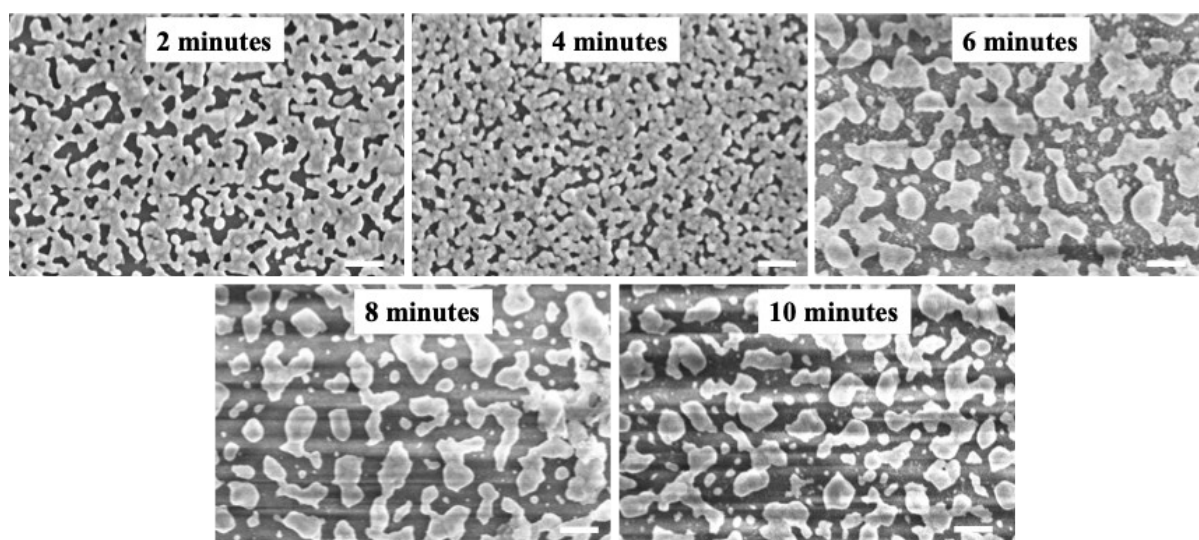

**Figure S5.** FESEM images of the Ag film annealed at 200 °C for varying time intervals. (scale bar: 500 nm)

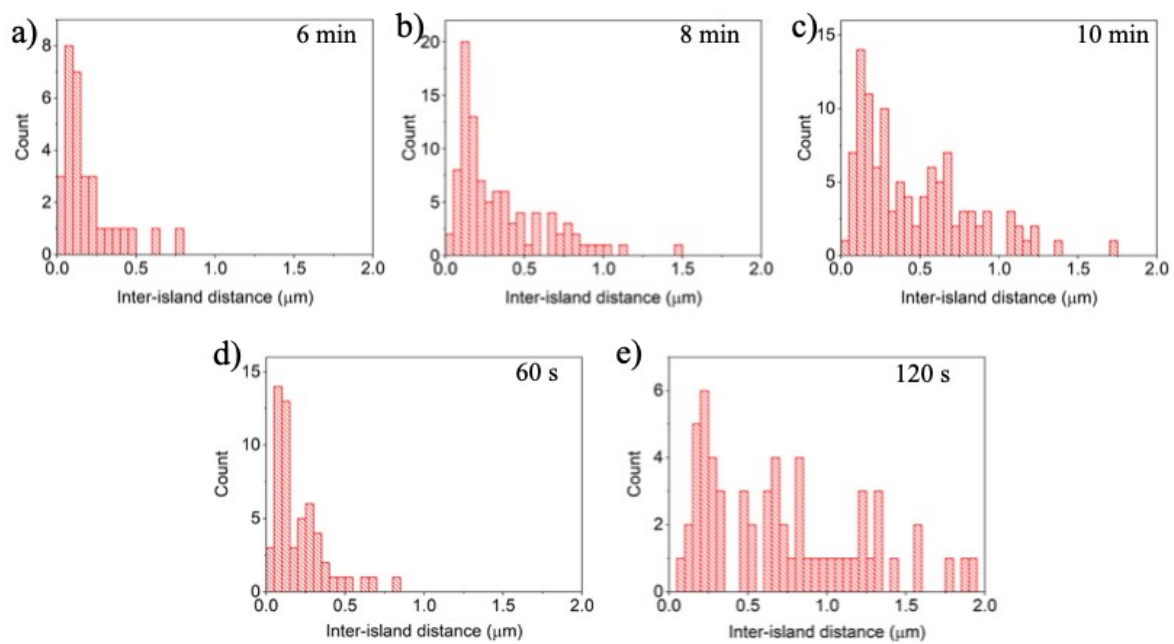

**Figure S6.** Statistical distributions of inter-island spacing for different annealing times at (a–c) 200 °C

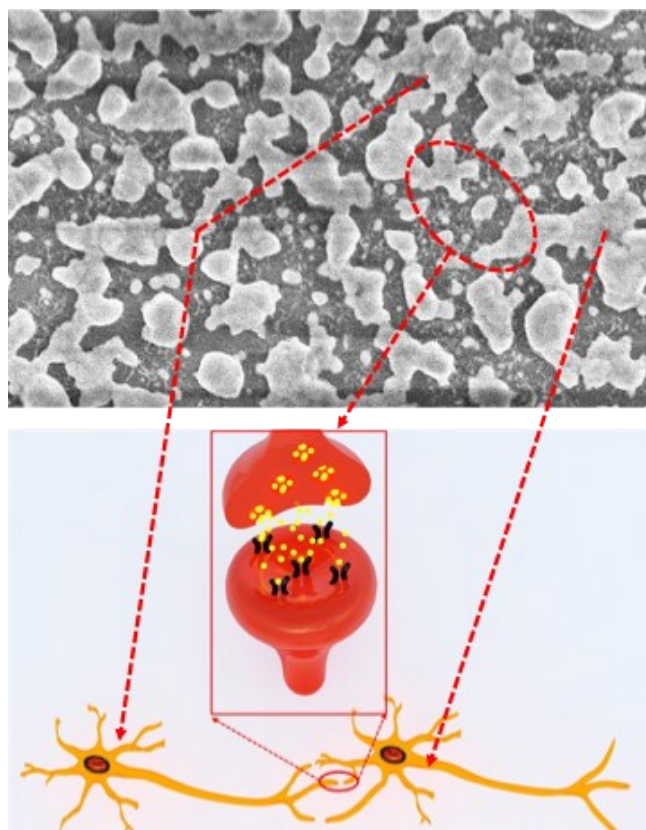

and (d,e) 300 °C.

**Figure S7.** Illustration showing the resemblance between the Ag dewetted structure and a schematically represented bio-neural network.

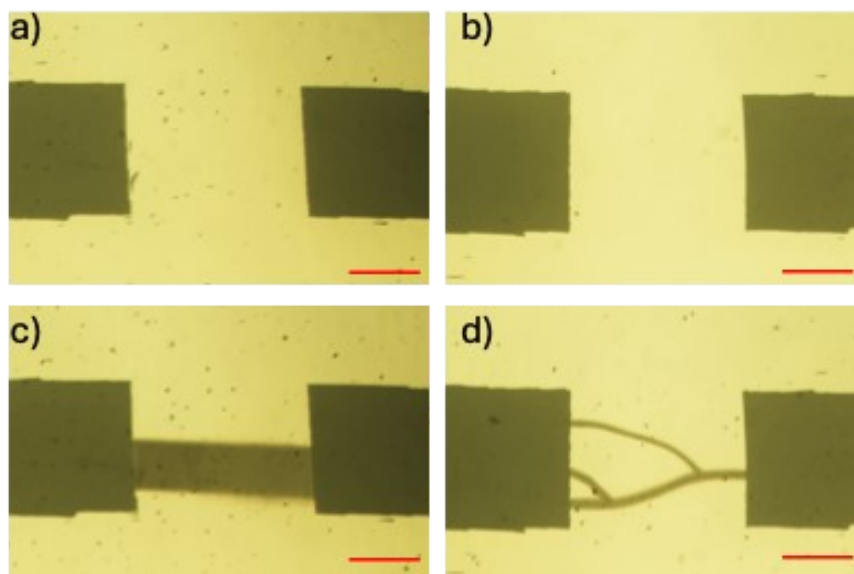

**Figure S8.** Ag particulate film printed across prefabricated Au electrodes, demonstrating on-demand printing capability. (Scale bar = 100  $\mu\text{m}$ )

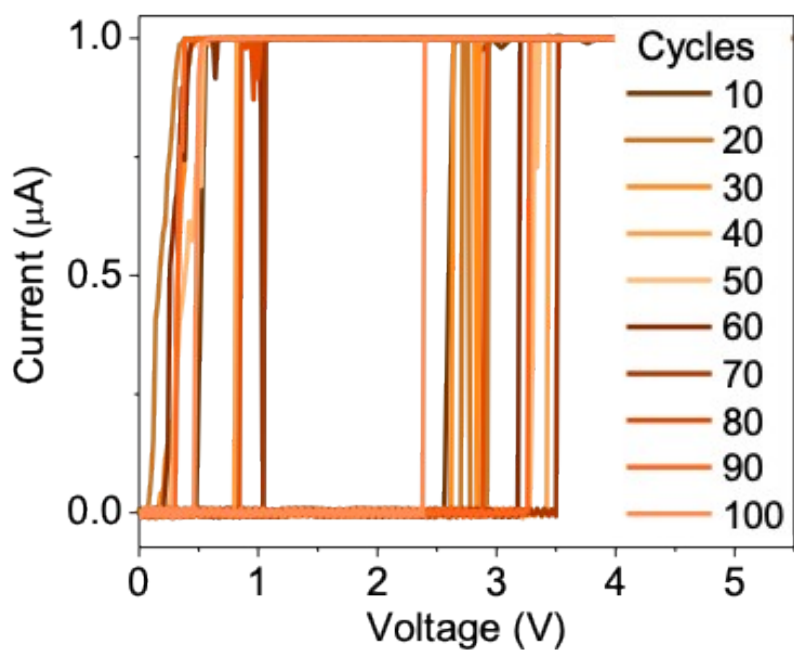

**Figure S9.** I–V characteristics of the device dewetted at 300  $^{\circ}\text{C}$  for 60 s. The device exhibited threshold switching at  $3 \pm 0.4$  V.

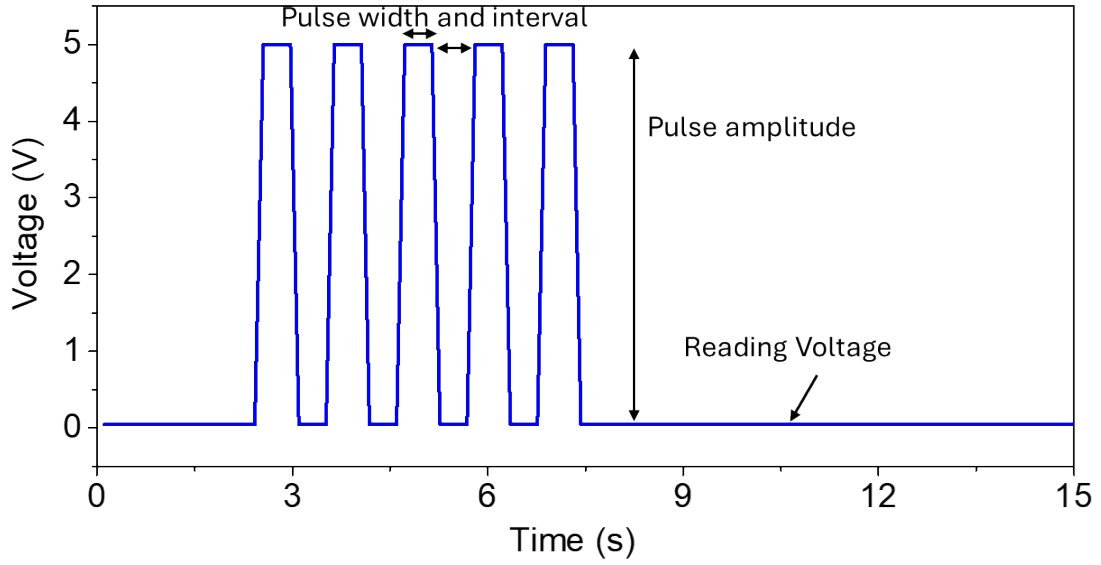

**Figure S10.** Pulse configuration used for emulating synaptic features.

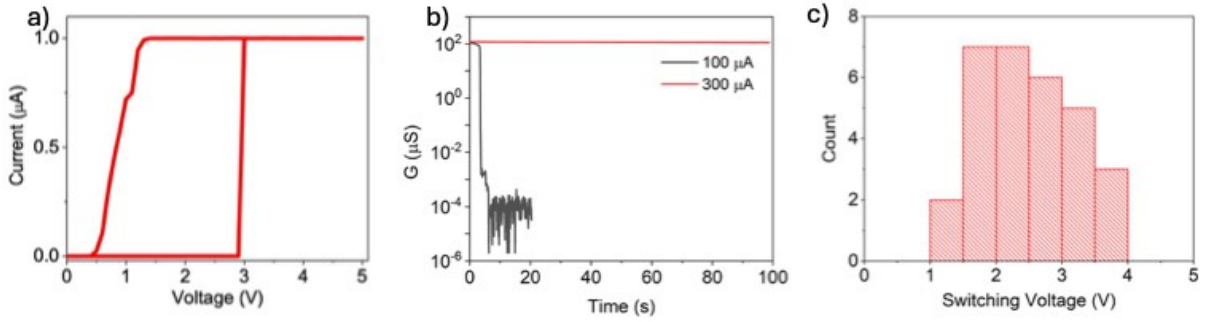

**Figure S11.** a) I-V characteristics of the device and b) STP and LTP (for 5 pulses of 5 V, 50 mV reading voltage) reproduced after 6 months showing the ambient stability and reproducibility. c) Switching voltage distribution of 15 devices studied for multiple cycles showing device to device variability.

**Note S1:**

Retention–reading voltage characteristics were fitted using an asymmetric Gaussian model as given below,

$$\text{Retention, } \tau(V_R) = A \cdot \exp\left(-\frac{(V_R - V_{opt})^2}{2\sigma(V_R)^2}\right), \sigma(V_R) = \begin{cases} \sigma_{L'} & V_R \leq V_{opt} \\ \sigma_{R'} & V_R > V_{opt} \end{cases} \text{-----(1)}$$

where  $A$  denotes the peak retention at the optimal reading voltage ( $V_{opt}$ ).  $\sigma(V_R)$  is the reading voltage-dependent width factor, where the parameters  $\sigma_L$  and  $\sigma_R$  represent the widths of the retention decay on the low- and high-voltage sides, respectively, capturing the asymmetric sensitivity of Ag filament stability to insufficient electric field (low  $V_R$ ) and Joule-heating-driven dissolution (high  $V_R$ ). A smaller  $\sigma$  value indicates higher sensitivity of the device to changes in the reading voltage. From the fitting,  $\sigma_L$  (0.064) was found to be smaller than  $\sigma_R$  (0.1), indicating that the retention is more sensitive on the low-voltage side.

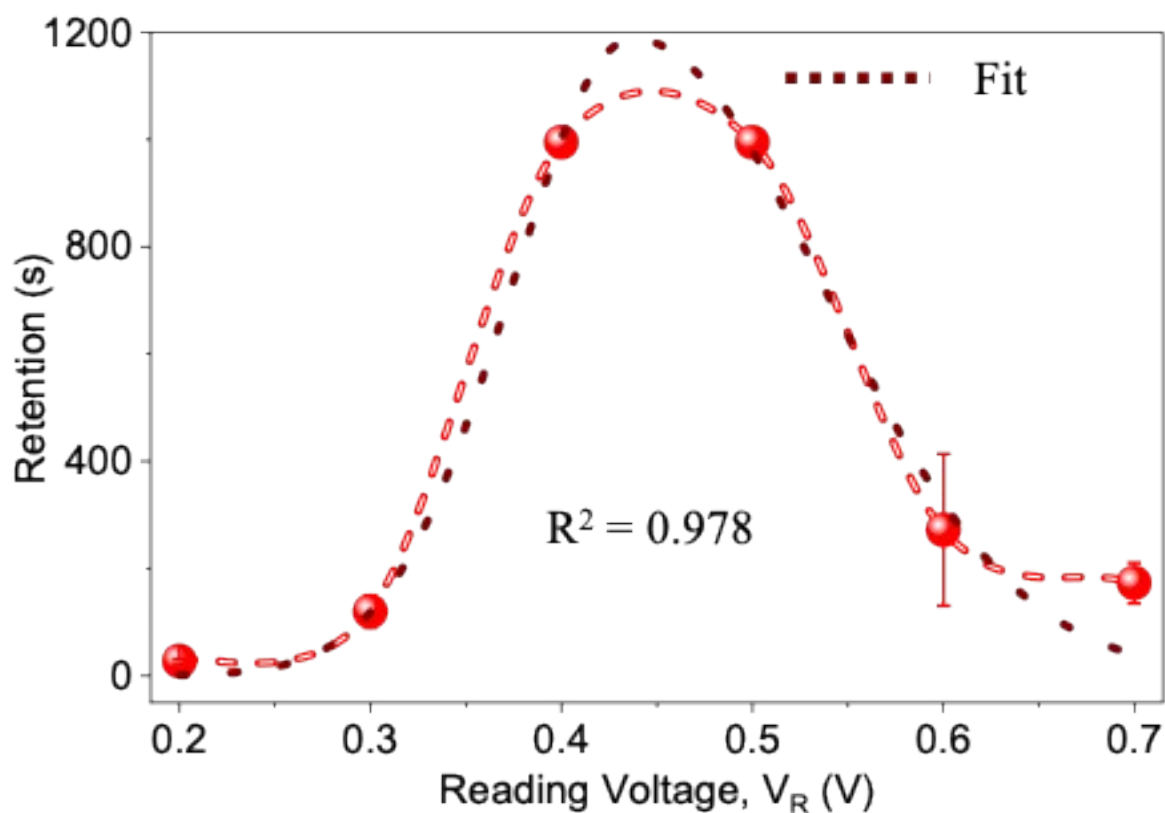

**Figure S12.** Modeling the inverted-U dependence using an asymmetric Gaussian function.

**Table S1:** Performance comparison of Ag artificial synaptic network (Ag-ASN)–based devices.

| Process                                                              | Electrode geometry            | Electrode gap ( $\mu\text{m}$ ) | Switching voltage (V) | Remarks                                                                                | Dewetting conditions                 | Ref.             |
|----------------------------------------------------------------------|-------------------------------|---------------------------------|-----------------------|----------------------------------------------------------------------------------------|--------------------------------------|------------------|
| Spin coating silver precursor<br>→<br>anneal→dewet                   | 2-probe                       | 10                              | 1.89±0.55             | Mechanistic insights into switching mechanism                                          | 270 °C for 30 s                      | 1                |
|                                                                      | 2-probe                       | 10                              | 1-4                   | Emulated STP, LTP associative learning                                                 |                                      | 2                |
| Vacuum deposition→anneal→dewet→vacuum deposition of Ag nanoparticles | 2-probe                       | 100                             | 0.5                   | Flexible device, emulated STP, LTP, Associative learning                               | 200 °C for 80 s                      | 3                |
| Vacuum deposition→anneal→dewet                                       | IDT                           | 10                              | 0.43 ± 0.04           | Emulated PPF, tip of the tongue experience                                             | 300 °C for 30 s                      | 4                |
|                                                                      | IDT                           | 10                              | 0.42 ± 0.05           | Excellent linearity, demonstrated arithmetic operations and number recognition         |                                      | 5                |
|                                                                      | IDT                           | 10                              | 0.45                  | Emulated STP, LTP, Supervision learning, nociception behaviour                         | 300 °C for 40 s                      | 6                |
|                                                                      | 2-probe                       | -                               | 0.6                   | Emulated STP, LTP 2 <sup>nd</sup> order associative learning                           | 300 °C for 30 s                      | 7                |
|                                                                      | 2-probe                       | 7                               | 1.2                   | Emulated STP, LTP, Supervision learning, interest-based learning, associative learning |                                      | 8                |
|                                                                      | Optical printing→anneal→dewet | 2-probe                         | 250                   | 3.4 ± 0.4                                                                              | Emulated STP, LTP, Yerkes-Dodson Law | 200 °C for 6 min |

STP – Short-term Plasticity, LTP – Long-term potentiation

**References:**

- 1 T. S. Rao, R. Gupta and G. U. Kulkarni, *Small*, 2025, **21**, 2502771.
- 2 T. S. Rao, I. Mondal, B. Bannur and G. U. Kulkarni, *Discov. Nano*, 2023, **18**, 124.
- 3 B. Yadav, I. Mondal, B. Bannur and G. U. Kulkarni, *Nanotechnology*, 2024, **35**, 015205.
- 4 M. Pal, N. S. Vidhyadhiraja and G. U. Kulkarni, *Adv. Funct. Mater.*, 2025, **35**, 2425635.
- 5 M. Pal, M. Kaur, B. Yadav, A. Bisht, V. N. S. and G. U. Kulkarni, *ACS Appl. Mater. Interfaces*, 2025, **17**, 5239–5253.
- 6 M. Pal, B. Yadav, I. Mondal, M. Kaur, N. S. Vidhyadhiraja and G. U. Kulkarni, *Nanoscale*, 2025, **17**, 19434–19446.
- 7 B. Bannur, B. Yadav and G. U. Kulkarni, *ACS Appl. Electron. Mater.*, 2022, **4**, 1552–1557.
- 8 B. Bannur and G. U. Kulkarni, *Mater. Horiz.*, 2020, **7**, 2970–2977.
